# Supplementary material for: Thirty Minutes Identified as the Threshold for Development of Pain in Low Back and Feet Regions, and Predictors of Intensity of Pain during 1-h Laboratory-Based Standing in Office Workers
Source: MDPI journal article supplement (doi:10.3390/ijerph19042221), 2022-02-16
Supplement: s1 [file s1]

a)

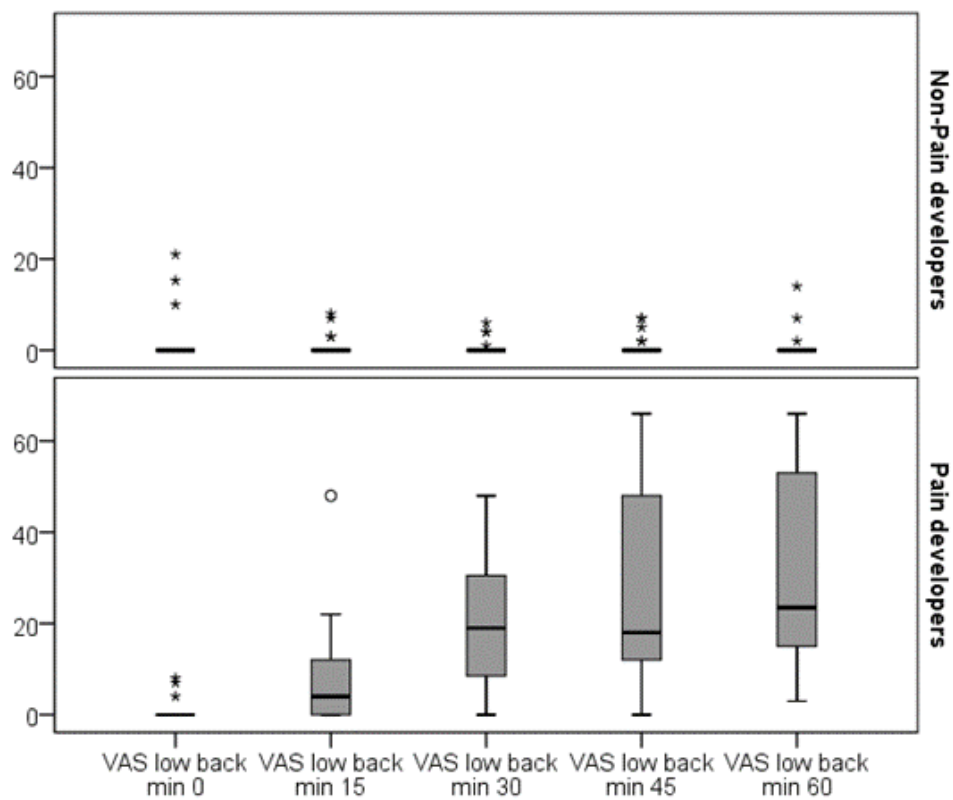

b)

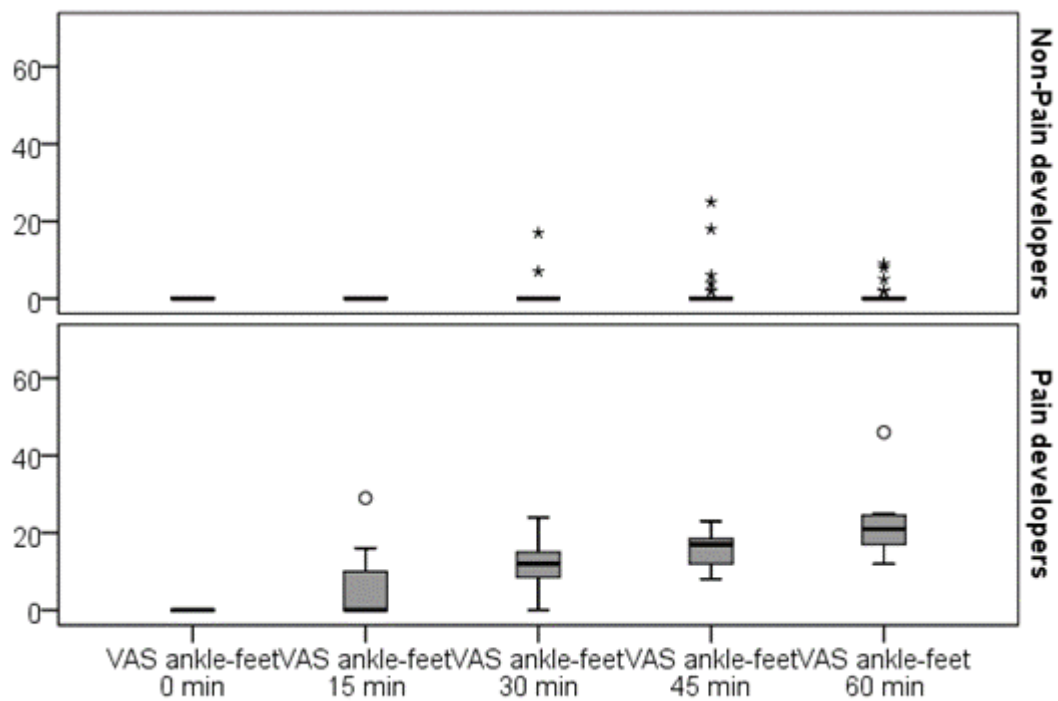

**Figure S1.** Pain development during 1h-standing for PD and NPD groups: (a) at low back; (b) at ankle-feet areas

**Table S1.** Spearman correlation coefficients between the maximum increment at VAS scores at low back and ankle-foot regions throughout of the standing task and measured variables for PD groups.

|                                                                                                     | Low back    |       | Ankle-feet |       |
|-----------------------------------------------------------------------------------------------------|-------------|-------|------------|-------|
|                                                                                                     | PD (n = 14) |       | PD (n = 9) |       |
|                                                                                                     | Rho         | p     | Rho        | p     |
| Age (years)                                                                                         | -0.082      | 0.780 | 0.083      | 0.831 |
| BMI (kg/m2)                                                                                         | 0.262       | 0.365 | 0.017      | 0.966 |
| IPAQ, during de last 7 days, how much time did you usually spend sitting on a weekend day (minutes) | 0.047       | 0.874 | -0.347     | 0.360 |
| IPAQ, during de last 7 days, how much time did you usually spend sitting on a weekday (min)         | 0.544*      | 0.044 | 0.525      | 0.146 |
| IPAQ, MET min/week                                                                                  | 0.020       | 0.946 | 0.583      | 0.099 |
| LBP severity, last 7 days (0-100)                                                                   | 0.463       | 0.096 | 0.365      | 0.334 |
| OSPAQ, minutes sitting at work per week                                                             | -0.245      | 0.398 | -0.210     | 0.587 |
| OSPAQ, minutes standing at work per week                                                            | 0.049       | 0.869 | 0.619      | 0.075 |
| OSPAQ, minutes walking at work per week                                                             | 0.073       | 0.804 | -0.345     | 0.364 |
| JCQ, Job Control                                                                                    | 0.583*      | 0.029 | -0.133     | 0.732 |
| JCQ, Psychological Job Demands                                                                      | 0.392       | 0.165 | -0.099     | 0.800 |
| JCQ, Social Support                                                                                 | 0.323       | 0.260 | 0.365      | 0.334 |
| JCQ, Physical Demands                                                                               | -0.395      | 0.162 | 0.070      | 0.859 |
| PCS, Rumination                                                                                     | 0.367       | 0.196 | 0.176      | 0.651 |
| PCS, Magnification                                                                                  | -0.242      | 0.404 | 0.121      | 0.756 |
| PCS, Helplessness                                                                                   | 0.164       | 0.574 | 0.305      | 0.425 |
| PCS-total                                                                                           | 0.142       | 0.627 | 0.117      | 0.765 |
| SF-12, Mental Component Summary                                                                     | 0.037       | 0.899 | 0.117      | 0.765 |
| SF-12, Physical Component Summary                                                                   | -0.522      | 0.056 | -0.083     | 0.831 |
| ASLR, total examiner-score (0-10)                                                                   | 0.551*      | 0.041 | 0.220      | 0.569 |
| ASLR, total participant-score (0-10)                                                                | 0.382       | 0.177 | 0.456      | 0.218 |
| AHAbd, right side, examiner-score (0-3)                                                             | -0.034      | 0.907 | 0.128      | 0.742 |
| AHAbd, left side, examiner-score (0-3)                                                              | 0.248       | 0.392 | 0.498      | 0.172 |
| AHAbd, right side, participant-score (0-5)                                                          | 0.217       | 0.457 | 0.492      | 0.179 |
| AHAbd, left side, participant-score (0-5)                                                           | 0.082       | 0.780 | 0.613      | 0.079 |
| Abdominal (s)                                                                                       | -0.198      | 0.497 | -0.433     | 0.244 |
| Side Bridge right side (s)                                                                          | -0.578*     | 0.030 | -0.533     | 0.139 |
| Side Bridge left side (s)                                                                           | -0.383      | 0.176 | -0.267     | 0.488 |
| Supine Bridge (s)                                                                                   | -0.568*     | 0.034 | 0.000      | 0.999 |
| Isometric hip abduction (right leg) (s)                                                             | -0.454      | 0.103 | -0.433     | 0.244 |
| Isometric hip abduction (left leg) (s)                                                              | -0.170      | 0.562 | -0.400     | 0.286 |
| Sorensen (s)                                                                                        | -0.289      | 0.317 | -0.967 *   | 0.000 |

\* $p \leq 0.05$ ; BMI, Body Mass Index; MET, Metabolic Equivalent of Task (computed as the sum of walking, moderate-intensity, and vigorous-intensity physical activity); OSPAQ, Occupational Sitting and Physical Activity Questionnaire; JCQ, Job Content Questionnaire; ASLR, Active Straight Leg Raise; AHAbd, Active Hip Abduction; s, seconds.
